# Supplementary material for: Gene S-phase kinase associated protein 2 is a novel prognostic marker in human neoplasms
Source: Springer Nature journal article supplement (doi:10.1186/s12920-023-01561-4), 2023-06-12
Supplement: MOESM2 [file 12920_2023_1561_MOESM2_ESM.pdf]

**Supplementary Material 2.** Age distribution differences between cancer group and normal group.

| Cancer | Group  | Age (year) |     | Chi-square test |                |
|--------|--------|------------|-----|-----------------|----------------|
|        |        | <65        | ≥65 | $\chi^2$        | <i>p</i> value |
| BLCA   | Normal | 5          | 14  | 0.871           | 0.351          |
|        | Tumor  | 150        | 257 |                 |                |
| BRCA   | Normal | 82         | 31  | 0.744           | 0.388          |
|        | Tumor  | 748        | 342 |                 |                |
| CESC   | Normal | 2          | 1   | 0.123           | 0.343          |
|        | Tumor  | 265        | 39  |                 |                |
| CHOL   | Normal | 1          | 8   | 2.552           | 0.110          |
|        | Tumor  | 17         | 19  |                 |                |
| COAD   | Normal | 11         | 30  | 4.205           | <b>0.040*</b>  |
|        | Tumor  | 125        | 161 |                 |                |
| ESCA   | Normal | 5          | 8   | 1.778           | 0.182          |
|        | Tumor  | 104        | 77  |                 |                |
| GBM    | Normal | 0          | 0   | /               | 1.000          |
|        | Tumor  | 96         | 95  |                 |                |
| HNSCC  | Normal | 24         | 20  | 1.252           | 0.263          |
|        | Tumor  | 326        | 191 |                 |                |
| KICH   | Normal | 18         | 7   | 0.275           | 0.600          |
|        | Tumor  | 51         | 15  |                 |                |
| KIRC   | Normal | 43         | 32  | 0.676           | 0.411          |
|        | Tumor  | 330        | 200 |                 |                |
| KIRP   | Normal | 16         | 16  | 1.277           | 0.258          |
|        | Tumor  | 172        | 113 |                 |                |
| LIHC   | Normal | 20         | 30  | 7.046           | <b>0.008*</b>  |
|        | Tumor  | 220        | 148 |                 |                |
| LUAD   | Normal | 27         | 32  | 0.032           | 0.858          |
|        | Tumor  | 220        | 274 |                 |                |
| LUSC   | Normal | 16         | 34  | 0.132           | 0.716          |
|        | Tumor  | 169        | 320 |                 |                |
| PAAD   | Normal | 3          | 1   | 0.410           | 0.522          |
|        | Tumor  | 82         | 96  |                 |                |
| PCPG   | Normal | 3          | 0   | /               | 1.000          |
|        | Tumor  | 153        | 24  |                 |                |
| PRAD   | Normal | 34         | 18  | 0.025           | 0.875          |
|        | Tumor  | 329        | 166 |                 |                |
| READ   | Normal | 5          | 5   | 0.000           | 1.000          |
|        | Tumor  | 47         | 44  |                 |                |
| STAD   | Normal | 13         | 23  | 0.521           | 0.471          |
|        | Tumor  | 173        | 236 |                 |                |
| THCA   | Normal | 49         | 10  | 0.143           | 0.706          |
|        | Tumor  | 428        | 76  |                 |                |

---

|      |        |    |    |       |               |
|------|--------|----|----|-------|---------------|
| UCEC | Normal | 10 | 3  | 4.206 | <b>0.040*</b> |
|      | Tumor  | 84 | 93 |       |               |

---

Notes: \* $p < 0.05$ .
