# Supplementary material for: Gene S-phase kinase associated protein 2 is a novel prognostic marker in human neoplasms
Source: Springer Nature journal article supplement (doi:10.1186/s12920-023-01561-4), 2023-06-12

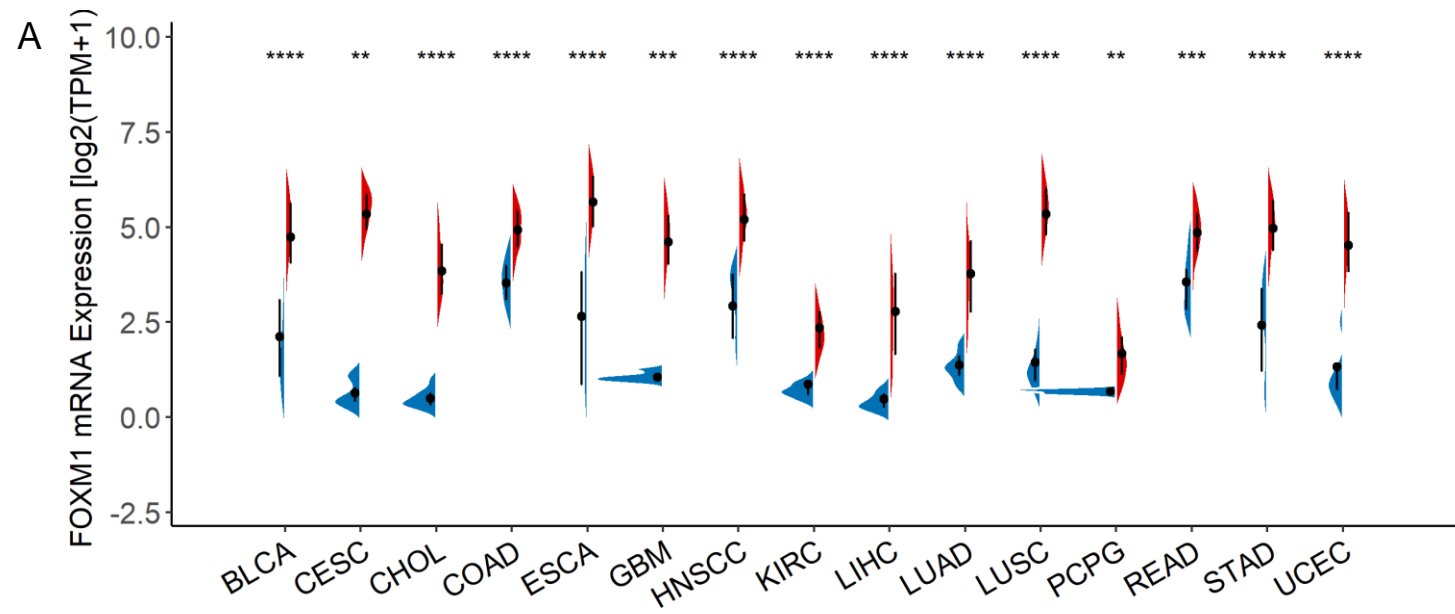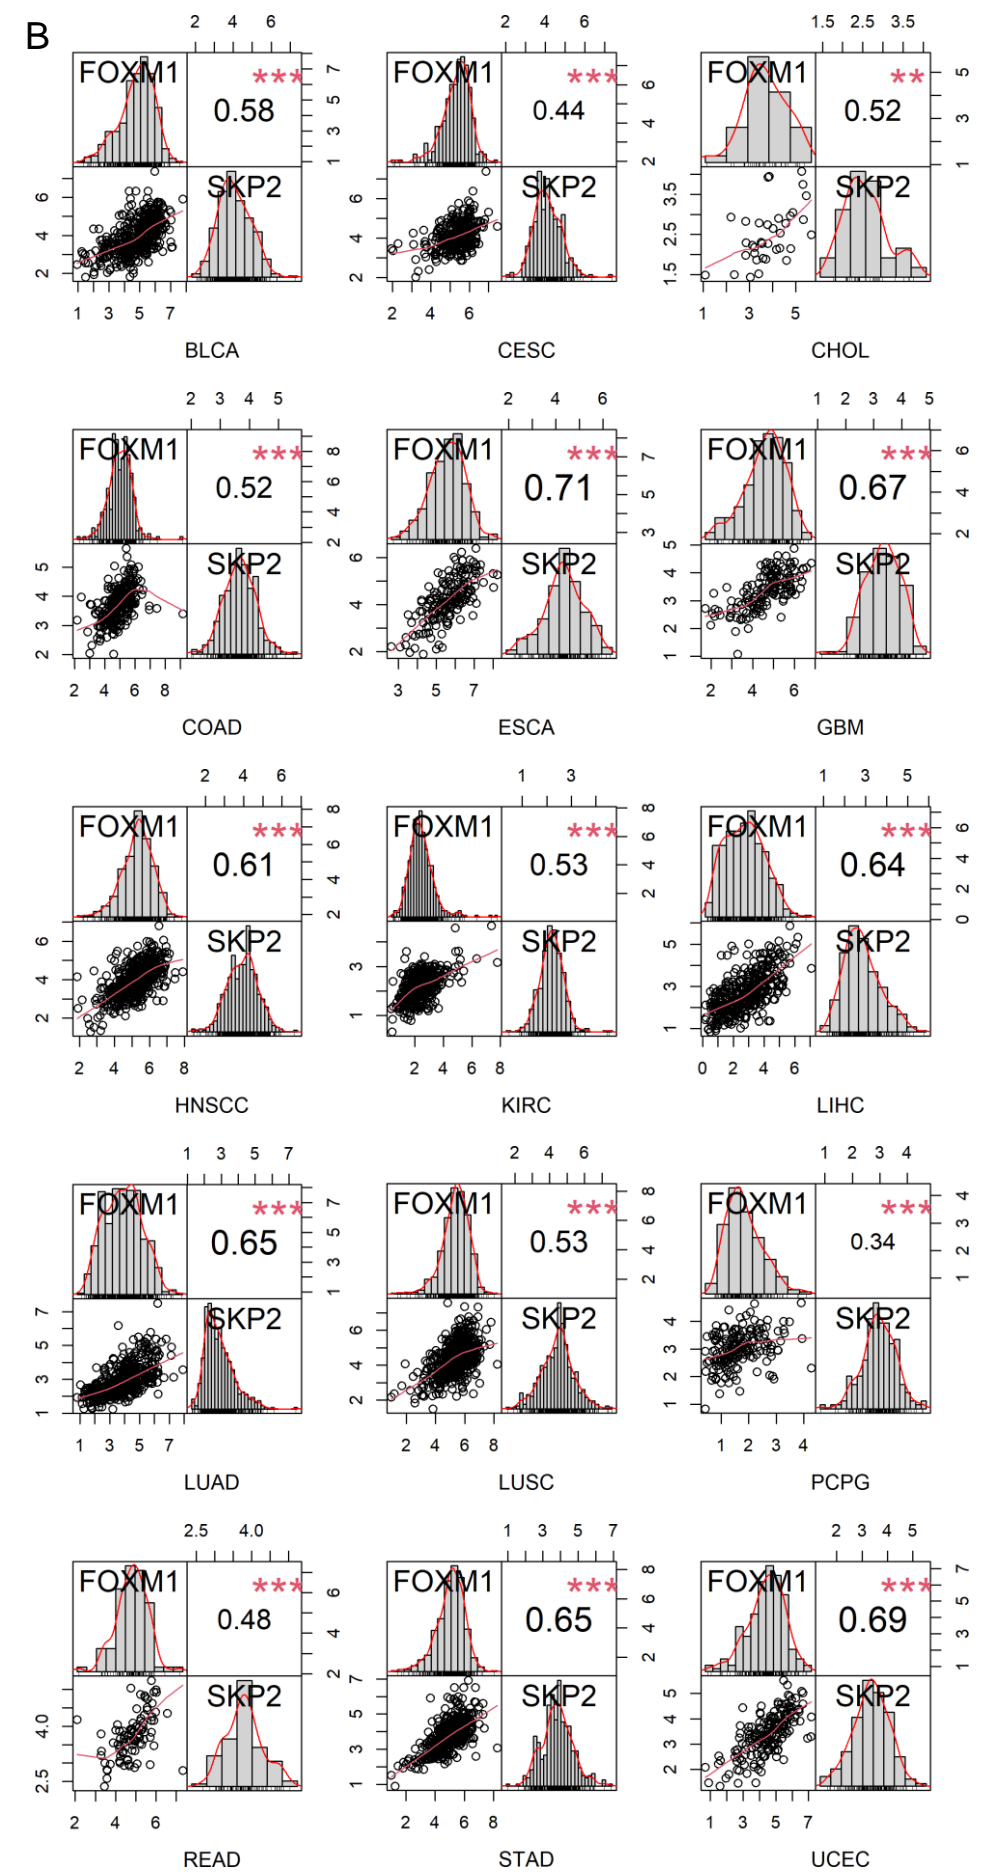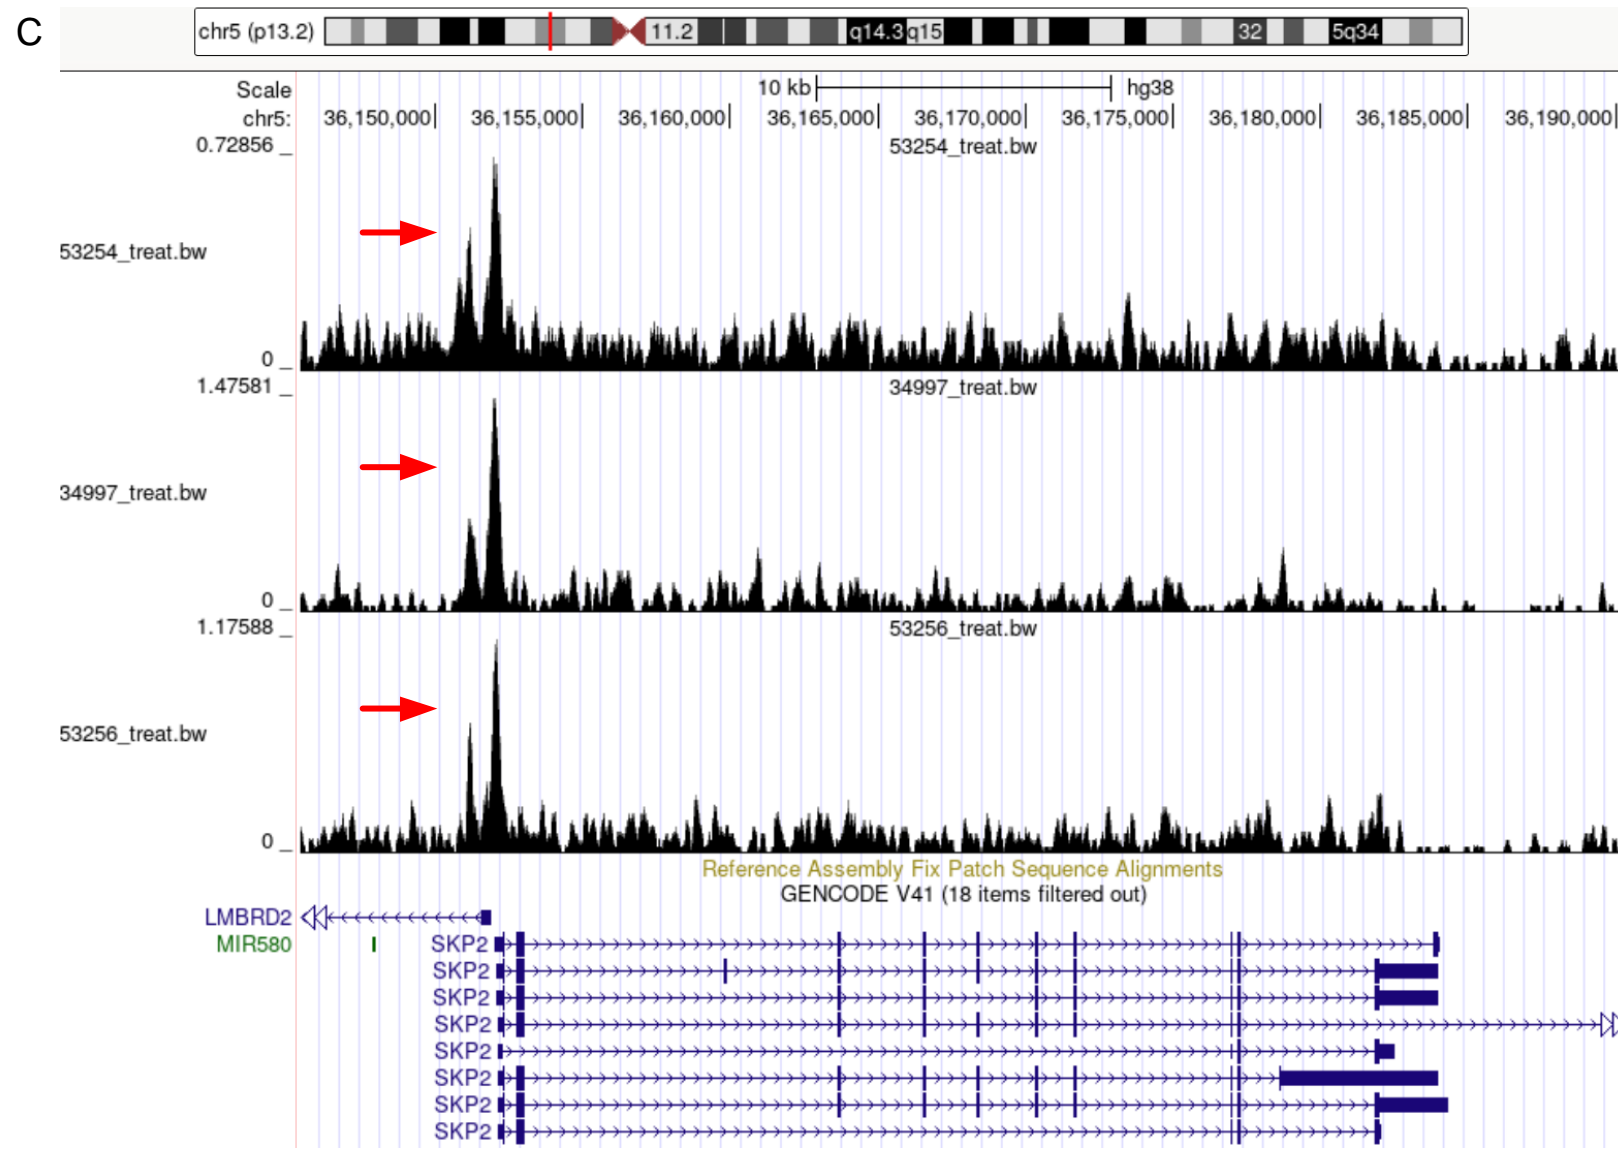

Supplement: MOESM5 [file 12920_2023_1561_MOESM5_ESM.pdf]
